# Supplementary material for: Integrative bioinformatics analyses of mitochondrial dysfunction-related genes in human non-obstructive azoospermia
Source: Research Square preprint supplement (doi:10.21203/rs.3.rs-7035452/v1), 2025-07-25
Supplement: Supplementary file 1 [file 97d84b714b54c2d4bc55ec4b.pdf]

# Integrative bioinformatics analyses of mitochondrial dysfunction-related genes in human non-obstructive azoospermia

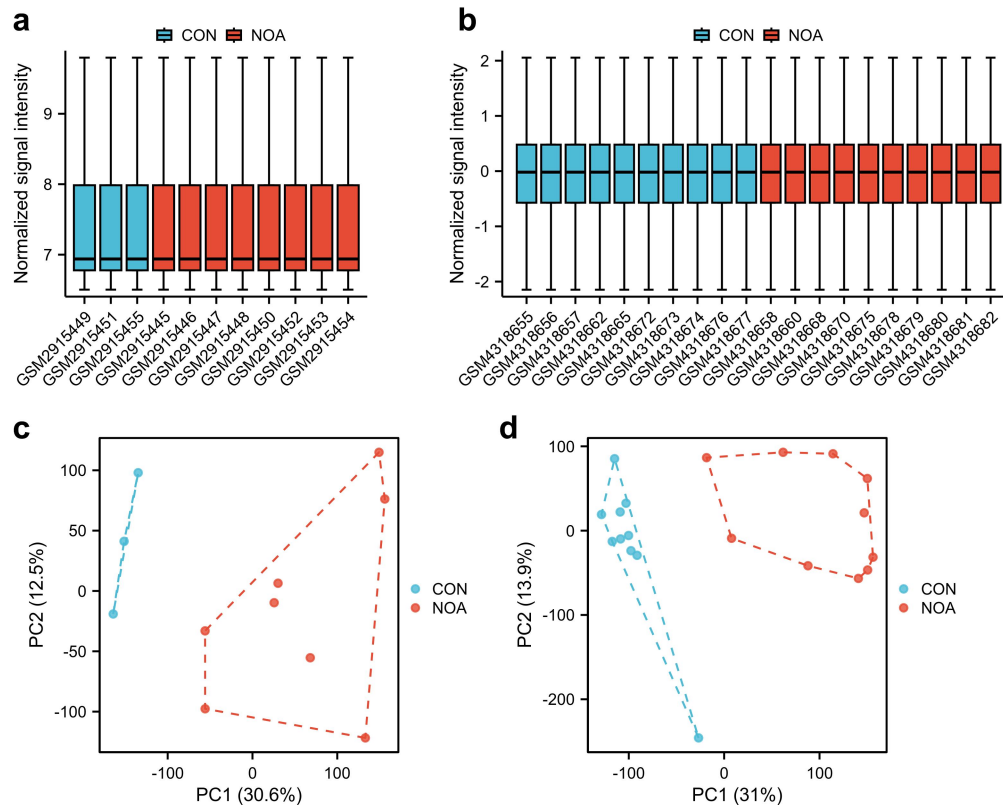

**Supplementary Fig. S1.** Box plots and Principal Component Analysis of samples in GSE108886 and GSE145467. In the box plots for GSE 108886 (**a**) and GSE145467 (**b**), the x-axis represented the sample symbol and the y-axis represented the normalized gene expression value. In the Principal Component Analysis for GSE108886 (**c**) and GSE145467 (**d**), the x-axis and y-axis represented Principal Component 1 and Principal Component 2, respectively. And the distances between the points reflected the differences among samples. CON, control; NOA, non-obstructive azoospermia.

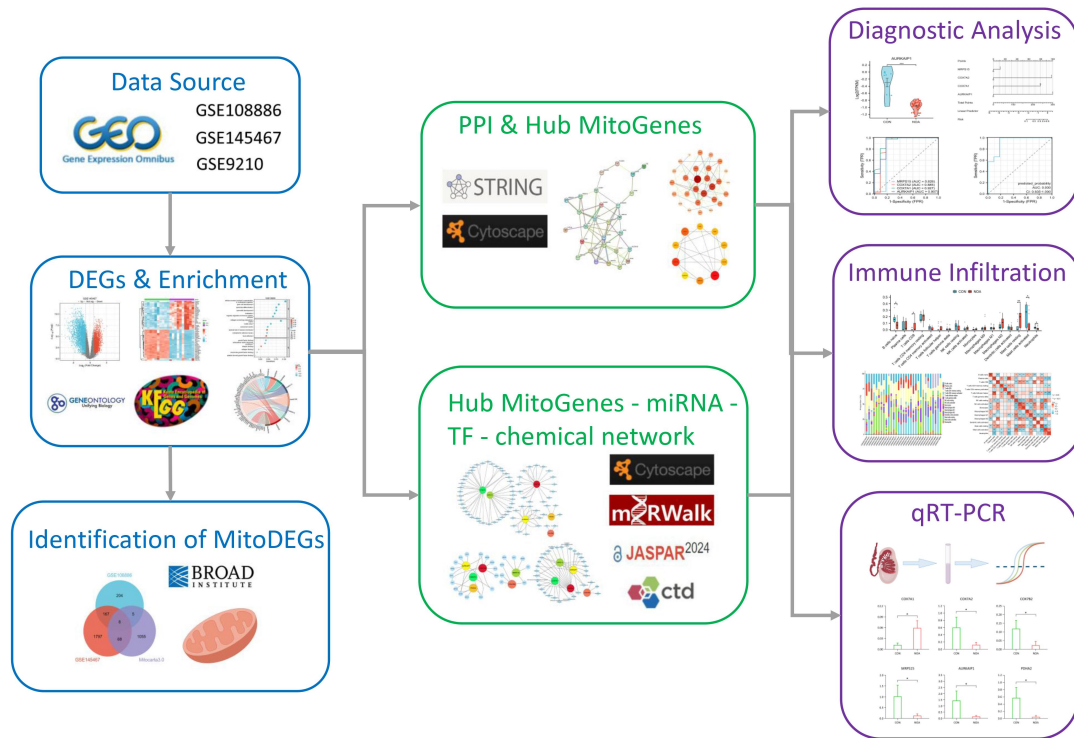

14

15 **Supplementary Fig. S2.** The workflow chart of data processing, analysis and

16 validation.

17 **Supplementary Table S1.** Demographic and clinical characteristics between NOA  
18 and OA patients.

| Characteristics             | NOA (n=3)  | OA (n=3)   | <i>P</i> value |
|-----------------------------|------------|------------|----------------|
| Age (year)                  | 31.67±2.40 | 33.33±6.01 | 0.809          |
| BMI (Kg/m <sup>2</sup> )    | 23.35±1.66 | 23.89±1.11 | 0.798          |
| FSH (mIU/ml)                | 27.34±0.90 | 6.82±3.10  | 0.003          |
| INB (pg/ml)                 | 37.88±5.22 | 87.77±5.96 | 0.003          |
| Testosterone (ng/ml)        | 3.45±0.33  | 4.52±0.95  | 0.038          |
| Mean testicular volume (ml) | 8.83±0.72  | 17.5±1.44  | 0.006          |
| NAG (mU/ejaculate)          | 31.50±1.36 | 4.84±2.58  | <0.001         |
| Fructose (μmol/ejaculate)   | 32.83±6.16 | 37.43±7.64 | 0.664          |

19  
20 Data are presented as mean ± standard error. NOA: non-obstructive azoospermia; OA:  
21 obstructive azoospermia; FSH: follicle-stimulating hormone; INH-B: inhibin B; NAG:  
22 neural α-glucosidase.

23    **Supplementary Table S2.** Summary of key information of datasets used in the study.

| GSE<br>Accession | Platform | Organism     | Sample        | Type | Sample size |     |
|------------------|----------|--------------|---------------|------|-------------|-----|
|                  |          |              |               |      | Control     | NOA |
| GSE108886        | GPL10558 | Homo sapiens | Testis tissue | mRNA | 3           | 8   |
| GSE145467        | GPL4133  | Homo sapiens | Testis tissue | mRNA | 10          | 10  |
| GSE9210          | GPL887   | Homo sapiens | Testis tissue | mRNA | 20          | 20  |

24
